# Supplementary material for: Immunoglobulin gene rearrangements in Chinese and Italian patients with chronic lymphocytic leukemia
Source: PubMed Central journal article supplement (PMC4991472; doi:10.18632/oncotarget.7819), 2016-03-01
Supplement: oncotarget-07-20520-s001.pdf [file oncotarget-07-20520-s001.pdf]

## **SUPPLEMENTARY TABLES**

**Supplementary Table S1: Italian CLL IGHV repertoire - IGHV repertoire of Italian CLL (IGHV genes, mutations and stereotypy)**

**See Supplementary File 1**

**Supplementary Table S2: Chinese CLL IGHV repertoire - IGHV repertoire of Chinese CLL (IGHV genes, mutations and stereotypy)**

**See Supplementary File 2**
